# Supplementary material for: Compositional data network analysis via lasso penalized D-trace loss
Source: Oxford University Press journal article supplement (doi:10.1093/bioinformatics/btz098), 2019-02-14
Supplement: bioinformatics_35_18_3404_s8.zip [file bioinformatics_35_18_3404_s8.zip]

## Subject Section

# Supplementary for Compositional Data Network Analysis via Lasso Penalized D-Trace Loss

Huili Yuan<sup>1,3</sup>, Shun He<sup>1,3</sup> and Minghua Deng<sup>1,2,\*</sup>

<sup>1</sup>School of Mathematical Sciences, Peking University, Beijing, 10087, P.R.China

<sup>2</sup>Center for Statistical Science, Peking University, Beijing, 10087, P.R.China

<sup>3</sup>These authors contributed equally to this work.

\*To whom correspondence should be addressed.

Associate Editor: XXXXXXXX

Received on XXXXX; revised on XXXXX; accepted on XXXXX

## Abstract

**Supplementary:** The technical details for derivation of Algorithm 1 are summarized in this supplementary. The networks constructed with CD-trace, gCoda, S-E(glasso) and S-E (mb) for Control, Healthy and EBA group in real data analysis are presented in Fig. S1, Fig. S2 and Fig. S3, respectively.

**Contact:** dengmh@math.pku.edu.cn

## 1 Technical Details for Algorithm 1

Here, we give the details in the derivation of our ADMM algorithm. Since the objective function in (12) is convex, taking the partial derivative with respect to  $\Theta_1$  and setting it as zero, we get

$$F\Theta_1 F\hat{\Sigma}_{\text{In } \mathbf{x}} F/2 + 3\rho\Theta_1 - \rho(\Theta_3^k + \Theta_2^k + \Theta_4^k) - F/2 - \Lambda_1^k + \Lambda_3^k - \Lambda_4^k = 0. \quad (\text{S1})$$

Solving this is equivalent to solving the equation of the form

$$AXB + \gamma X = C, \quad (\text{S2})$$

where  $A$  and  $B$  are symmetric, nonnegative definite matrices,  $\gamma > 0$  is a constant and  $C$  is a matrix. Explicit solution to equation (S2) is given by the following Lemma.

**Lemma 1.** Let  $A = U_A \Sigma_A U_A^T$  and  $B = U_B \Sigma_B U_B^T$  be the eigenvalue decompositions of the symmetric matrices  $A$  and  $B$ , respectively. Assume that  $G(A, B, C, \gamma)$  is the solution to (S2). Then,  $G(A, B, C, \gamma) = U_A [D \circ (U_A^T C U_B)] U_B^T$ , where  $D_{ij} = (\sigma_i^A \sigma_j^B + \gamma)^{-1}$  and  $\circ$  denotes the Hadamard product of two matrices.

The above Lemma can be verified by plugging  $G(A, B, C, \rho)$  into equation (S2) with some basic calculations. According to this Lemma, the solution to (S1) can be written as

$$\Theta_1^{k+1} = G(F, F\hat{\Sigma}_{\text{In } \mathbf{x}} F, 2\rho\Theta_3^k + 2\rho\Theta_2^k + 2\rho\Theta_4^k + F + 2\Lambda_1^k - 2\Lambda_3^k + 2\Lambda_4^k, 6\rho).$$

Similarly, the solution to (13) is

$$\Theta_2^{k+1} = G(F\hat{\Sigma}_{\text{In } \mathbf{x}} F, F, 2\rho\Theta_3^k + 2\rho\Theta_1^{k+1} + 2\rho\Theta_4^k + F + 2\Lambda_3^k - 2\Lambda_2^k - 2\Lambda_5^k, 6\rho).$$

Leaving out the constant terms in the objective function of (14), it is equivalent to solve

$$\argmin_{\Delta_3} \rho \|\Theta_3\|_F^2 - \langle \Theta_3, \rho\Theta_1^{k+1} + \rho\Theta_2^{k+1} - \Lambda_1^k + \Lambda_2^k \rangle + \lambda \|\Theta_3\|_{1, \text{off}}.$$

Given a matrix  $A$  and  $\lambda > 0$ , let  $S(A, \lambda)$  be the solution to the following optimization problem

$$S(A, \lambda) = \argmin_{\Theta} \frac{1}{2} \|\Theta\|_F^2 - \langle \Theta, A \rangle + \lambda \|\Theta\|_{1, \text{off}}.$$

It is easy to check that the  $(i, j)$ th component of  $S(A, \lambda)$  ( $i \neq j$ ) is

$$S(A, \lambda)_{i,j} = \begin{cases} A_{i,j} - \lambda, & A_{i,j} > \lambda, \\ A_{i,j} + \lambda, & A_{i,j} < -\lambda, \\ 0, & -\lambda \leq A_{i,j} \leq \lambda. \end{cases}$$

Thus the solution to (14) is

$$\Theta_3^{k+1} = S((\rho\Theta_1^{k+1} + \rho\Theta_2^{k+1} - \Lambda_1^k + \Lambda_2^k)/2\rho, \lambda/2\rho).$$

To update  $\Theta_4$ , we rewrite (15) as

$$\argmin_{\Theta_4 \succeq \epsilon I} \rho \|\Theta_4\|_F^2 - \langle \Theta_4, \rho\Theta_1^{k+1} + \rho\Theta_2^{k+1} - \Lambda_4^k + \Lambda_5^k \rangle.$$

Following the idea of Zhang and Zou (2014), we define a matrix operator  $[X]_+$  for a symmetric matrix  $X$ : let the eigenvalue decomposition of  $X$

be  $U_X \text{diag}(\lambda_1, \dots, \lambda_p) U_X^T$ , then

$$[X]_+ = U_X \text{diag}\{\max(\lambda_1, \epsilon), \dots, \max(\lambda_p, \epsilon)\} U_X^T.$$

Then the solution to (15) is

$$\Theta_4^{k+1} = \left[ \frac{\rho \Theta_1^{k+1} + \rho \Theta_2^{k+1} - \Lambda_4^k + \Lambda_5^k}{2\rho} \right]_+$$

Since the update of  $\Lambda_i, i = 1, 2, 3, 4, 5$  is trivial, we now have all the pieces needed to carry out the alternating direction method. This AMD algorithm has been summarized in Algorithm 1.

## 2 Networks Constructed in Real Data Analysis

The networks constructed with CD-trace, gCoda, S-E(glasso) and S-E (mb) for Control, Healthy and EBA group in real data analysis are presented in Fig. S1, Fig. S2 and Fig. S3, respectively.

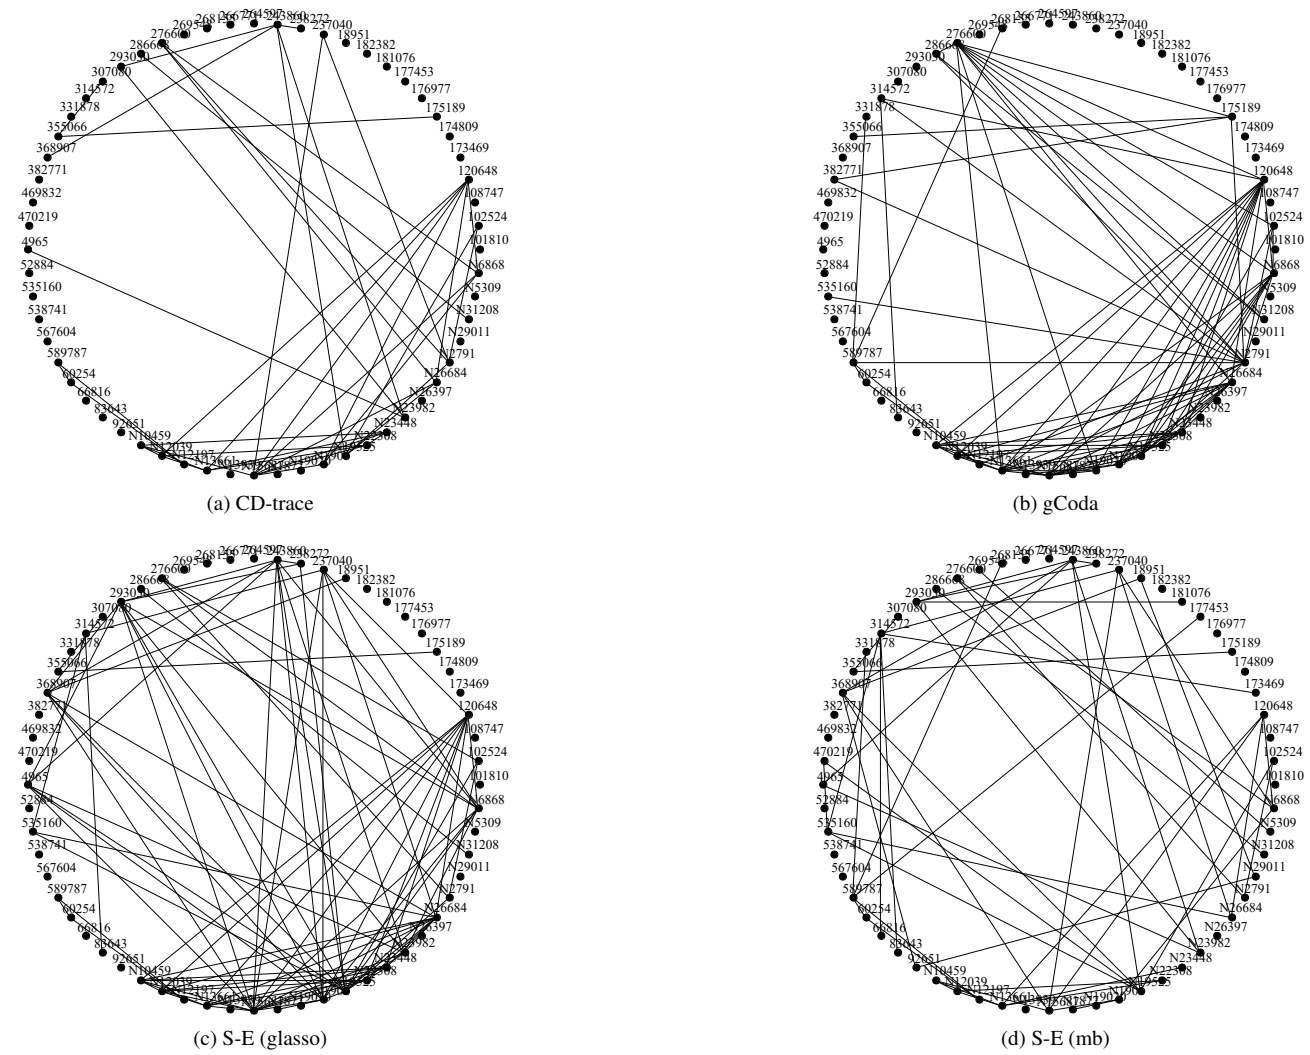

**Fig. S1.** The networks constructed with different methods for Control group.

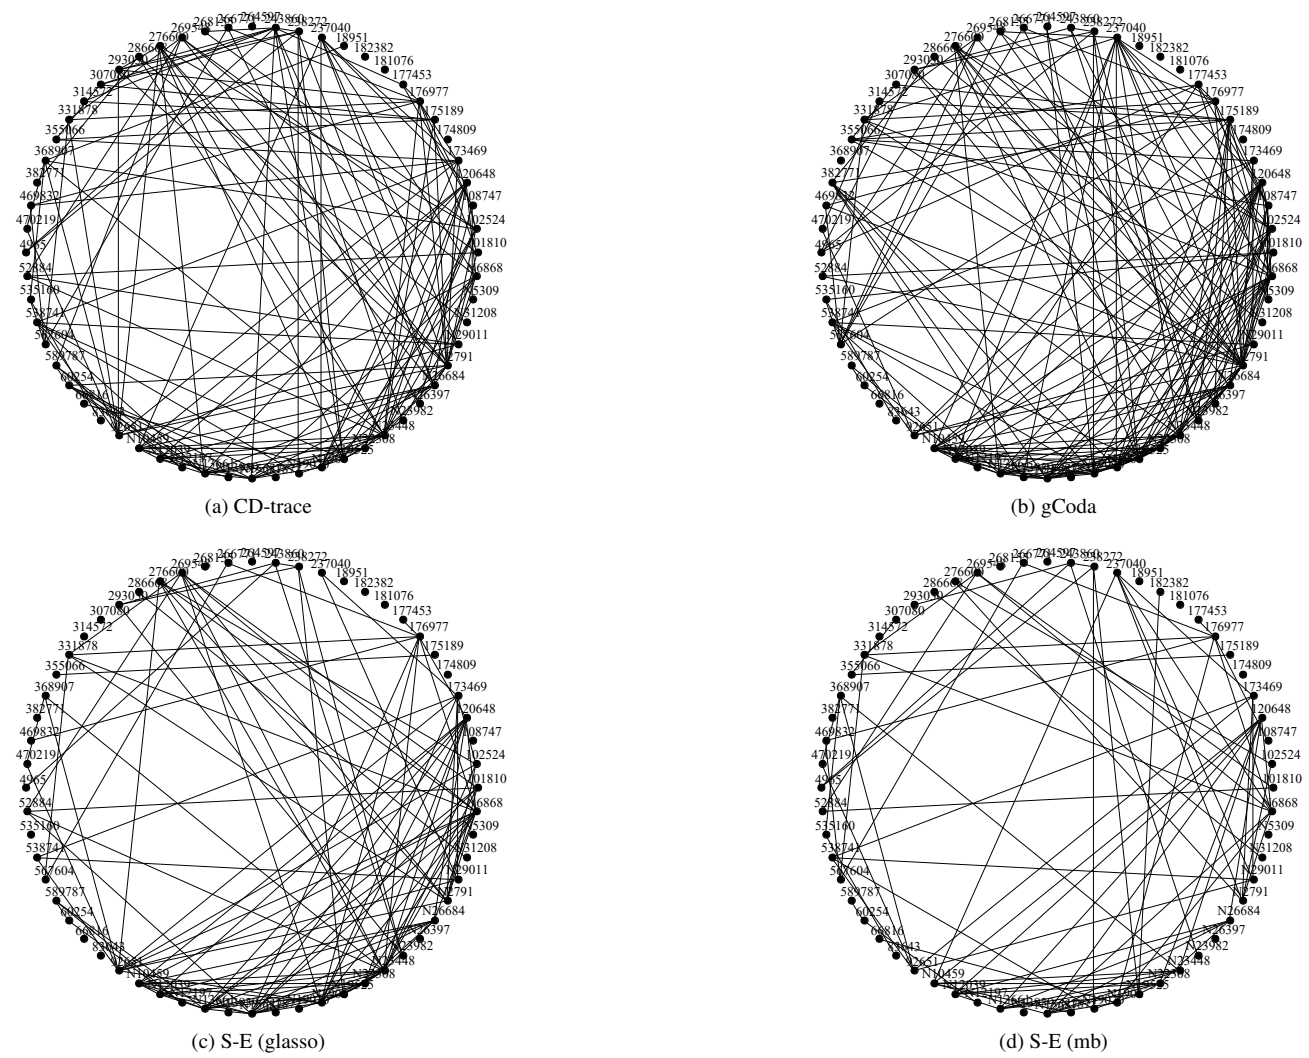

**Fig. S2.** The networks constructed with different methods for Healthy group.

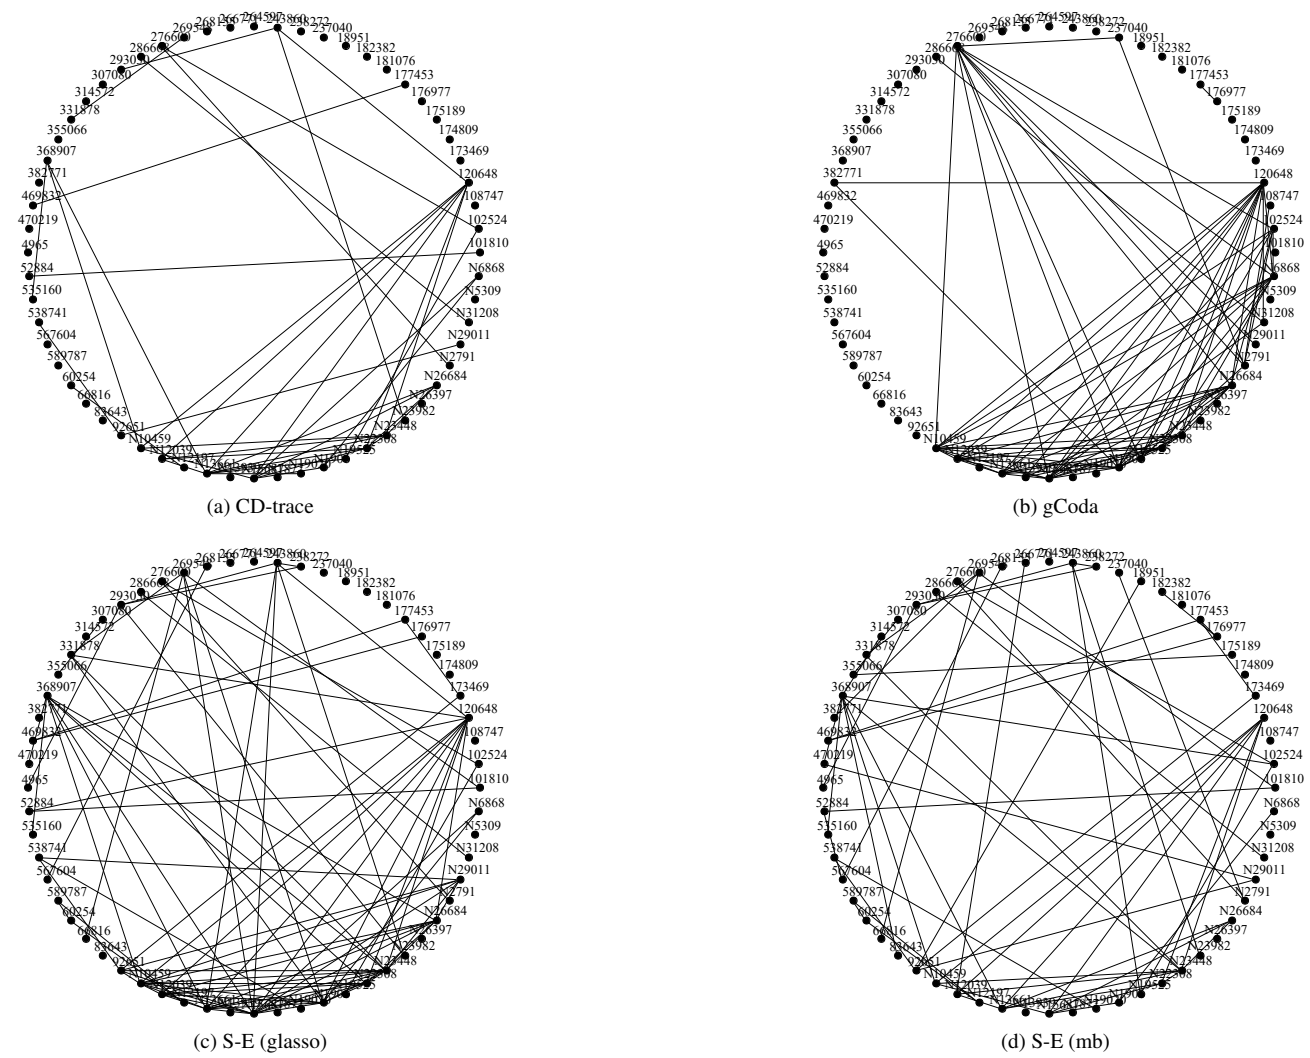

**Fig. S3.** The networks constructed with different methods for EBA group.
